# Supplementary material
Source: publisher figshare collection journal article supplement (https://tandf.figshare.com/ndownloader/files/20706930)
Supplement: Supplementary file 1 [file 20706930]

Table 1. List of non-native herbaceous plant species found on Navarino Island, southern Chile, adapted from Rozzi et al. (2004) from which the photographs showed to the participants during the interviews were created.

| **Latin name** | **English name** | **Chilean Spanish name** |
| --- | --- | --- |
| *Achillea millefolium* | Yarrow | Milenrama |
| *Agrostis capillaris* | Common bent | Chépica |
| *Agrostis stolonifera* | Creeping bentgrass | Chépica |
| *Alopecurus geniculatus* | Water foxtail | - |
| *Alopecurus pratensis* | Meadow foxtail | - |
| *Anthoxanthum odoratum* | Sweet vernal grass | Pasto oloroso |
| *Bellis perennis* | Common daisy | Primavera |
| *Capsella bursa-pastoris* | Shepherd's purse | Bolsita del Pastor |
| *Cerastium fontanum* | Mouse-ear chickweed | Oreja de ratón |
| *Cirsium vulgare* | Spear thistle | Cardo |
| *Coronopus didymus* | Lesser-swine cress | - |
| *Dactylis glomerata* | Cock's-foot | Pasto ovillo |
| *Holcus lanatus* | Yorkshire fog | Pasto miel |
| *Hypochaeris radicata* | Catsear | Hierba del chancho |
| *Juncus bufonius* | Toad rush | Junquillo |
| *Leucanthemum vulgare* | Oxeye daisy | Margarita |
| *Linum catharticum* | Purging flax | - |
| *Matricaria discoidea* | Pineappleweed | Manzanilla |
| *Mentha sp.* | Mint | Mentha |
| *Myosotis discolor* | Forget-me-not | No me olvides |
| *Papaver somniferum* | Opium poppy | Amapola |
| *Plantago lanceolata* | Ribwort plantain | Llantén |
| *Plantago major* | Broadleaf plantain | Llantén |
| *Poa nemoralis* | Wood bluegrass | - |
| *Poa pratensis* | Kentucky bluegrass | Pasto azul |
| *Poa trivialis* | Rough bluegrass | - |
| *Ribes grossularia* | Gooseberry | Grosella |
| *Rubus idaeus* | Raspberry | Frambueso |
| *Rumex acetosella* | Sheep's sorrel | Vinagrillo |
| *Rumex crispus* | Curly dock | Romaza |
| *Sagina procumbens* | Procumbent pearlwort | - |
| *Senecio vulgaris* | Groundsel | Hierba cana |
| *Stellaria media* | Chickweed | Quilloi-quilloi |
| *Taraxacum officinale* | Dandelion | Diente de león |
| *Thlaspi arvense* | Field pennycress | Maleza Común |
| *Trifolium aureum* | Large hop trefoil | Trébol amarillo |
| *Trifolium dubium* | Lesser trefoil | Trébol enano |
| *Trifolium repens* | White clover | Trébol blanco |
| *Urtica dioica* | Common nettle | Ortiga mayor |
| *Veronica serpyllifolia* | Thyme-leaved speedwell | Verónica |
